1 **An effective workshop on “How to be an Effective Mentor for Underrepresented STEM**  
2 **Trainees”**

3 Andrea G. Marshall<sup>1\*</sup>, Caroline B. Palavicino-Maggio<sup>2\*</sup>, Elsie Spencer<sup>3</sup>, Zer Vue<sup>1</sup>, Heather  
4 Beasley<sup>1</sup>, Edgar Garza-Lopez<sup>4</sup>, Lillian Brady<sup>5</sup>, Zachary Conley<sup>6</sup>, Kit Neikirk<sup>7</sup>, Sandra Murray<sup>8</sup>,  
5 Denise Martinez<sup>9</sup>, Haysetta Shuler<sup>10</sup>, Derrick Morton<sup>11#</sup>, Antentor Hinton, Jr.<sup>1,4#</sup>

6 **Author Information**

- 7 1 Department of Molecular Physiology and Biophysics, Vanderbilt University, Nashville, TN  
8 2 Department of Neurobiology, Harvard Medical School, Boston, MA  
9 3 Teachers College, Columbia University, New York, NY, 10027 USA  
10 4 Hinton and Garza Lopez Family Consulting Company, Iowa City, IA  
11 5 Department of Pharmacology, Vanderbilt University, Nashville, TN  
12 6 Collaborative for STEM Education and Outreach, Department of Teaching and Learning,  
13 Vanderbilt University, Nashville, TN  
14 7 Department of Biology, University of Hawaii, Hilo, HI  
15 8 Department of Cell Biology, University of Pittsburgh School of Medicine, Pittsburgh, PA  
16 9 Department of Family Medicine, University of Iowa, Iowa City, IA  
17 10 Department of Biological Sciences, Winston-Salem State University, Winston-Salem, NC  
18 11 Department of Biological Sciences, University of Southern California, Los Angeles, CA

19 \*These authors share co-first authorship

20 #These authors share co-senior authorship

21 Co-Corresponding Author: antentor.o.hinton,jr@vanderbilt.edu

22 Co-Corresponding Author: mortond@usc.edu

23

24

25 **Abstract**

26 Despite an increase in programming to promote persons excluded by their ethnicity or race  
27 (PEER) scholars, minorities remain underrepresented in many STEM programs. The academic  
28 pipeline is largely leaky for underrepresented minority (URM) scholars due to a lack of effective  
29 mentorship. Many URM students experience microaggressions and discrimination from their  
30 mentors due to a lack of quality mentorship training. In this workshop, we provide a framework  
31 for how to be an effective mentor to URM trainees. Mentees, especially URM trainees, can  
32 flourish in effective mentoring environments where they feel welcomed and can comfortably  
33 develop new ideas without feeling threatened by external factors. Effective mentoring  
34 environments provide motivational support, empathy, cultural competency, and training.

35 **Keywords** Diversity, STEM, Professional Development, Higher Education, Mentorship,  
36 Culturally Supportive, Cultural Competence

37

## 38 **The framework of the workshop**

39           Designing an effective mentorship workshop requires examples of the characteristics of  
40 effective mentors of underrepresented minority (URM) trainees, a blueprint for selecting mentees  
41 based on the mentorship environment, and strategies for maintaining nurturing mentor-mentee  
42 relationships. Mentor-mentee relationships require navigating unique challenges to ensure the  
43 success of URM trainees. Frequently, URM students face microaggressions, imposter fear, and  
44 difficulties in building networks and mentorship relationships, which increase the risk of falling  
45 out of the academic pipeline (Hinton Jr *et al.* 2020a; National Academies of Sciences 2020;  
46 Shuler *et al.* 2021; Uddin and De Los Reyes 2021). Despite the nature of these challenges, based  
47 on scientific findings, URM trainees perform better under supportive mentorship relationships,  
48 which can help them overcome the daily challenges that deters them from staying in the  
49 academic pipeline (Hinton Jr *et al.* 2020a; Termini *et al.* 2021a).

50           During the workshop strategies were presented to help potential mentors identify best  
51 practices for effective and motivational mentoring. The importance of celebrating the mentee and  
52 their journey was emphasized in the workshop, in addition the mentor was provided strategies  
53 for identifying mentees in need of special guidance. These strategies encouraged mentors to  
54 reframe how they think about students, work to have a more authentic mentor-mentee  
55 relationships, and develop a motivation-based mentoring approach based on emotional  
56 intelligence (Gardenswartz, Cherbosque and Rowe 2010; Opengart and Bierema 2015;  
57 Montgomery 2017; Hinton *et al.* 2020; Hinton Jr *et al.* 2020b; Shuler *et al.* 2021).

58 In the workshop, all participants were presented with a model of intentional mentorship. This  
59 mentoring model emphasizes a willingness to learn and establish credibility while facilitating the

60 formation of positive relationships through networking (Shuler *et al.* 2021). Workshop  
61 participants were also exposed to effective and ineffective mentorship practices (Neikirk 2021).  
62 Furthermore, the workshop discussed using motivational mentoring as a way to cultivate the  
63 mentee's spirit of excellence as they navigate their career development -- through the use of  
64 individual development plans (IDP) (National Academies of Sciences 2020; Shuler *et al.* 2021).  
65 These strategies are especially useful for mentees during times of hardship, such as classroom  
66 challenges. (McReynolds *et al.* 2020; Termini *et al.* 2021b).

67

## 68 **Introduction**

69 Mentoring relationships are essential for the development of a mentee's career, especially those  
70 from URM groups. Successful mentoring requires environments that bolster motivational  
71 ambition, provides empathy, and utilizes cultural competency. Toxic mentoring environments  
72 arise from poor communication, lack of commitment and experience, conflicting personalities,  
73 perceived competition, poor perceived performance, and difficulty in forming interpersonal  
74 connections with the mentee.

### 75 **Key goals for successfully mentoring diverse trainees:**

- 76 • Practice meditation and mindfulness
- 77 • Be aware of your own biases
- 78 • Create a positive environment
- 79 • Respond, do not react

- 80 • Promote self-motivation, encompass your inner resources to act, reach, and achieve goals
- 81 and aspirations
- 82 • Provide constructive, not deconstructive, criticisms
- 83 • Cultural competence

#### 84 **Motivational Support: How to motivate and support diverse trainees simultaneously?**

85 Motivation is the inner drive to excel, which is often changed by internal and/or external conflict.

86 This inner drive is important for cultivating goals and providing direction. A trainee's motivation

87 governs the direction of the trainee's behavior in any mentoring environment, such as their

88 effort, grit, and attitude. Minority trainees not only face external barriers during their educational

89 and career journey, such as toxic mentorship and institutional inequities, but also experience

90 internal challenges, such as John Henryism (Rolle *et al.* 2021). Furthermore, URM also face

91 barriers including imposter fear, also known as imposter syndrome which is discussed in the

92 workshop as a stigmatizing word that places the issue on the individual as opposed to the

93 environment (Hinton Jr *et al.* 2020b; Rolle *et al.* 2021). These barriers stimulate a lack of

94 confidence, which affects their perseverance. Since all trainees have different motivations,

95 mentors should personalize their mentorship approach based on their mentee's goals and

96 motivations. A single mentorship strategy is often insufficient for a diverse group of mentees.

97 Mentees differ physically and emotionally, including in their motor, moral, and learning abilities.

98 Mentors set an example for their trainees. Quality mentoring comes from being an inspiration

99 (Shuler *et al.* 2021). Mentorship is an investment, not only to their institutions but to society as

100 their mentees may make substantial contributions (Hinton Jr *et al.* 2020b; Shuler *et al.* 2021).

101 Thus, the mentor's character can play a big role in how mentees view themselves. An inspiring

102 mentor listens, serves, shares, focuses on positivity, stays authentic, is willing to learn, and  
103 remains humble. Minority trainees excel with positive reinforcement. Mentors foster positivity in  
104 their relationships with mentees. Mentors must also identify and restrain negative beliefs that  
105 may influence their guidance and be willing to accept constructive feedback.

### 106 **Providing support and empathy**

107 Mentors need to invest time in getting to know their mentees. Active listening is as important as  
108 intentional mentoring. An effective mentor sets aside time to speak with their mentees and pays  
109 attention to what they have to say (Shuler *et al.* 2021). Active listening, instead of passive  
110 listening, entails action. For example, if your mentee makes you aware of a concern or question,  
111 the mentor might not have an answer to a specific situation, which would require seeking out  
112 advice from their network. Intentional listening is essential to effectively communicate with  
113 mentees. For example, if a mentor does not completely understand their trainees' questions or  
114 concerns, the mentor may consider asking for clarification, which ensures a clear line of  
115 communication between the mentor and mentee (Shuler *et al.* 2021). Active listening also  
116 requires avoiding distractions, such as emails, while providing their mentees with undivided  
117 attention. Focus on clarifying the situation to best provide an answer or suggestion. It is also  
118 important a mentor maintains an open mind. Obstacles and setbacks are a good way for mentees  
119 and mentors to grow and develop their skills.

120 Furthermore, each challenge is unique. Although mentees may be of the same gender,  
121 racial/ethnic background, socio-economic background, or school systems, they are all individuals  
122 with different journeys and motivations. No racial/ethnic group is monochromatic hence it is  
123 essential to develop a personalized 'individual development plan' (IDP) (Hinton Jr *et al.* 2020b).

124 Effective mentors also seek to maintain transparency by breaking down communication barriers,  
125 including seeking out alternative approaches, media, or technology to carry out conversations.  
126 It is also important for mentors to focus on developing their emotional intelligence (EI), which is  
127 also known as emotional quotient or emotional intelligence quotient (Hinton Jr *et al.* 2020b,  
128 Shuler *et al.* 2021). EI is the ability of understanding feelings, emotional language, and signals  
129 conveyed by emotions (Hinton Jr *et al.* 2020b, Shuler *et al.* 2021).. EI involves distinguishing  
130 and managing our personal feelings and interactions from those of other people (Hinton Jr *et al.*  
131 2020b, Shuler *et al.* 2021). EI assists with managing your behavior, navigating social areas, and  
132 helping others make critical life choices (Hinton Jr *et al.* 2020b, Shuler *et al.* 2021). EI also helps  
133 identify personal biases in thinking (Hinton Jr *et al.* 2020b, Shuler *et al.* 2021). It is like a  
134 window to determine why a mentee or colleague behaves a certain way or avoids making certain  
135 decisions. Practicing empathy towards their mentees can help mentors and mentees communicate  
136 more efficiently.

### 137 **Cultural competency and training**

138 Cultural competence is the knowledge and skills needed to work with a diverse group in a  
139 meaningful relevant and productive way. Cultural competence involves an understanding of the  
140 role of religion, community, and culture in the lives and careers of underrepresented minority  
141 mentees. Mentors should familiarize themselves with common racial insensitivities and develop  
142 methods to ask questions on these topics with sensitivity & avoid perpetuating racial macro- and  
143 microaggressions.

144 Based on these concepts, we tested how students perceived the information and whether they  
145 could apply it to their career development and individual development plan. In this particular

146 questionnaire, we used four questions to gauge interest. The questions consisted of a 10-point  
147 scale that was based on rating the following concepts: overall presentation, support team, verbal  
148 and nonverbal communication skills, and networking.

149

## 150 **Methods**

151 Twenty-four students from Winston-Salem State University (a historically Black public  
152 university) attended a 90-minute virtual workshop. The participants completed an anonymous  
153 questionnaire before and after the workshop to gauge their expectations and satisfaction  
154 regarding the workshop (Table 1). The data were compared using nonparametric Wilcoxon  
155 matched-pairs and signed-rank tests to determine differences between measures. Differences  
156 were considered statistically significant when P values were less than 0.05. \*\*\*\*P < 0.0001;  
157 \*\*\*P < 0.001; \*\*P < 0.01; \*P < 0.05; NS, not significant P > 0.05; NS (not significant).

## 158 **Results**

159 We summarized the data from the questionnaires using box and whisker plots in which  
160 the red centerline denotes the median, and error bars denote the standard error. Individual values  
161 are represented by circles. Overall, participant feedback was positive. Responses to the pre-  
162 workshop questionnaires suggest that mentees did not initially believe the workshop would be  
163 beneficial (Figure 1A-D, Pre-Test). The data suggests that their low expectations may be a result  
164 of low exposure or lack of mentorship.

165 Importantly, inconsistent mentorship may alter the mentee trajectories (Packard 2003;  
166 Thomas, Willis and Davis 2007; Janis and Barker 2016). However, after the workshop, feedback  
167 scores increased by an average of 5.2 points on a 10-point scale. The median score was a 9 or  
168 higher for every question asked (Figure 1A-D, Post-Test), indicating that the workshop was  
169 found favorable and helpful for identifying mentors or considering mentors for other parts of  
170 their lives.

171 All post-workshop questionnaires show a significant difference compared with pre-  
172 workshop questions. Initially, on average, participants believed the workshop to be low to  
173 moderately informative with an average evaluation of 4.1 (Figure 1A, Pre-Test). Following the  
174 workshop, the average score increased by 4.8 to an overall average of 8.9, indicating most  
175 participants enjoyed the workshop (Figure 1A, Post-Test). Similarly, the average initial score for  
176 believing the workshop would help improve communication skills was 5.2 (Figure 1B, Pre-Test).  
177 Post-workshop, the average score increased by 4.8 points to an average of 9.9 (Figure 1B, Post-  
178 Test). The belief that the workshop would increase networking skills increased by 5.6 points; the  
179 average pre-test score was 3.9, while the average post-test score was 9.5 (Figure 1C). More so,  
180 initially, participants did not strongly believe the workshop would underscore the importance of  
181 having a support team, giving an average score of 3.6 (Figure 1D, Pre-Test). Following the  
182 workshop, this score rose by 5.7 to an average of 9.3 (Figure 1D, Post-Test). The metrics  
183 measured showed that, on average, mentees found the workshop informative and beneficial to  
184 developing their networking, communication, and collaboration skills (Figure 1A-D, Post-Test).

185 These workshops allow for trainees to explore concepts about adequate mentorship  
186 (Figure 1A-D). It is possible to interpret the data that initially students did not see the benefit of  
187 the workshop because they may have felt it was not specifically targeting them or irrelevant to  
188 their goals of developing a career at the undergraduate level (Figure 1A-D, Pre-Test). It is  
189 important to highlight that the students did achieve a sense of award from gleaning new  
190 information about mentorship. Taken together, these results suggest that career development  
191 workshops focused on mentorship may have a large impact on student development and  
192 performance level at the undergraduate level (Figure 1A-D).

193 **Discussion**

194 Mentoring is an important aspect of a mentee's career, especially those from URM groups  
195 (Hinton Jr *et al.* 2020a, 2020b). Taken together, the data from the questionnaire highlights the  
196 need for more career development opportunities focused on mentorship. This workshop also  
197 provided an opportunity for self-reflection for students to understand the importance of mentors  
198 and how they may be an important asset to achieving career goals. This workshop also provided  
199 a unique understanding of different mentoring practices, and which may be most effective or  
200 ineffective in a mentee-mentor relationship. Initially, enthusiasm for this type of program was  
201 low and students thought career development workshops were not essential to their development  
202 (Figure 1A-D, Pre-Test). However, the post-test results suggest that the students found this  
203 workshop offered a robust set of strategies and tools to use in their career development and an  
204 understanding of what type of mentor-mentee relationships they may need (Figure 1A-D, Post-  
205 Test).

206         Although our sample size was small, the data suggest that career development workshops  
207 are important for career advancement. We would further speculate that career advancement can  
208 be done within mentee-mentor relationships, as well as, through skill and knowledge-building  
209 workshops. We also suggest that students that experience this workshop can improve their  
210 overall skill set and help build an understanding of the need for introspection and evaluation of  
211 what may be helpful in their career advancement.

212         However, our dataset does not reflect a large stratification of participants by race and  
213 ethnicity, age, or sex. We suggest these workshops be given in other languages based on  
214 institutional demographics to effectively communicate the importance of career development to  
215 non-native speakers. Additionally, our study participants, although involved in STEM fields,  
216 may not represent the entire student-body population. Thus, we suggest that this workshop and

217 others be used to create a series to further enrich undergraduate career development across a  
218 wide variety of demographics. Equally, we suggest that workshops like these continue to be a  
219 resource to individuals that do not have access to career development opportunities. These  
220 workshops should be open access for others to disseminate the information and help broaden the  
221 true participation and motivation needed to pursue a STEM career. Furthermore, additional study  
222 is needed to identify additional areas that may aid in student success.

223 **Availability of data and materials:**

224 A PowerPoint presentation of the workshop is available in English and Spanish upon request.  
225 Survey data may be made available upon reasonable request.

226 **Acknowledgements:**

227 We thank the 24 students who participated in our survey.

228 **Funding:**

229 This work was supported by the UNCF/BMS EE Just Grant, Burroughs Wellcome Fund CASI  
230 Award, Burroughs Welcome Fund Ad-hoc Award, NIH SRP Subaward to #5R25HL106365-12  
231 from the NIH PRIDE Program, DK020593, Vanderbilt Diabetes and Research Training Center  
232 for DRTC Alzheimer's Disease Pilot & Feasibility Program, UNCF/BMS EE Just Faculty Fund  
233 Grant awarded to A.H.J.; 1K99GM141449-01 MOSAIC grant to C.P.M. and NSF grant MCB  
234 #2011577I and NIH T32 5T32GM133353 to S.A.M.

235 **Ethics Declaration, Project Title:** Promoting Engagement in science for underrepresented  
236 Ethnic and Racial minorities (P.E.E.R), 21-MortonD-HSR-SOM-01, Kaiser Foundation  
237 Research Institute FWA: FWA00002344

238 **Ethics Approval and consent to participate:** Yes

239 **Consent for publication:** Yes

240 **Competing interests:** Authors declare that they have no competing interests.

241

242 **References:**

243 Gardenswartz L, Cherbosque J, Rowe A. Emotional intelligence and diversity: A model for  
244 differences in the workplace. *Journal of Psychological Issues in Organizational Culture*  
245 2010;**1**:74–84.

246 Hinton AO, McReynolds MR, Martinez D *et al.* The power of saying no. *EMBO Rep* 2020;**21**,  
247 DOI: 10.15252/embr.202050918.

248 Hinton Jr AO, Termini CM, Spencer EC *et al.* Patching the leaks: Revitalizing and reimagining  
249 the STEM pipeline. *Cell* 2020a;**183**:568–75.

250 Hinton Jr AO, Vue Z, Termini CM *et al.* Mentoring minority trainees: minorities in academia  
251 face specific challenges that mentors should address to instill confidence. *EMBO reports*  
252 2020b;**21**:e51269.

253 Janis JE, Barker JC. Medical student mentorship in plastic surgery: the mentor’s perspective.  
254 *Plastic and reconstructive surgery* 2016;**138**:925e–35e.

255 McReynolds MR, Termini CM, Hinton AO *et al.* The art of virtual mentoring in the twenty-first  
256 century for STEM majors and beyond. *Nature Biotechnology* 2020;**38**:1477–82.

257 Montgomery BL. Mapping a mentoring roadmap and developing a supportive network for  
258 strategic career advancement. *Sage Open* 2017;**7**:2158244017710288.

259 National Academies of Sciences E and Medicine. The science of effective mentorship in  
260 STEM. 2020.

261 Neikirk K. Unique struggles and the ways mentorship can fail. *Cell Mentor* 2021.

262 Opengart R, Bierema L. Emotionally intelligent mentoring: Reconceptualizing effective  
263 mentoring relationships. *Human Resource Development Review* 2015;**14**:234–58.

264 Packard BW-L. Web-based mentoring: Challenging traditional models to increase women’s  
265 access. *Mentoring and Tutoring* 2003;**11**:53–65.

266 Rolle T, Vue Z, Murray S *et al.* Toxic stress and burnout: John henryism and social dominance  
267 in the laboratory and STEM workforce. *Pathogens and Disease* 2021, DOI:  
268 10.1093/femspd/ftab041.

269 Shuler H, Cazares V, Marshall A *et al.* Intentional mentoring: maximizing the impact of  
270 underrepresented future scientists in the 21st century. *Pathogens and Disease*  
271 2021;**79**:ftab038.

272 Termini CM, Hinton Jr AO, Garza-López E *et al.* Building Diverse Mentoring Networks that  
273 Transcend Boundaries in Cancer Research. *Trends in Cancer* 2021a.

274 Termini CM, McReynolds MR, Rutaganira FU *et al.* Mentoring during Uncertain Times. *Trends*  
275 *in Biochemical Sciences* 2021b.

276 Thomas KM, Willis LA, Davis J. Mentoring minority graduate students: Issues and strategies for  
277 institutions, faculty, and students. *Equal Opportunities International* 2007.

278 Uddin LQ, De Los Reyes A. Cultivating allyship through casual mentoring to promote diversity.  
279 *Trends in Cognitive Sciences* 2021.

280

281

282

283

284

285

286

287

288

289

290

291

292 **Table 1. Pre- and post-workshop evaluations.**

| <b>Pre-workshop survey questions</b>                                                                          | <b>Post-workshop survey questions</b>                                                                                    |
|---------------------------------------------------------------------------------------------------------------|--------------------------------------------------------------------------------------------------------------------------|
| On a scale of 1 to 10, do you think the presentation will keep you well informed?                             | On a scale of 1 to 10, how did you like the presentation?                                                                |
| On a scale of 1 to 10, how do you think the talk will improve your verbal and non-verbal communication?       | On a scale of 1 to 10, how do you think the talk helped you improve your verbal and non-verbal communication?            |
| On a scale of 1 to 10, how well do you think the talk will improve your networking skills?                    | On a scale of 1 to 10, how much do you think the talk helped you improve your networking skills?                         |
| On a scale of 1 to 10, how do you think the talk will improve your understanding of what a support team does? | On a scale of 1 to 10, how much do you think the talk helped you improve your understanding of what a support team does? |

293

294

295

296

297

298

299

300 **Figure Legend 1. Results from pre- and post-workshop evaluations.** These pre- and post-  
301 workshop questions were also used to evaluate mentees' knowledge regarding mentee-mentor  
302 relationships. **A.** The informativeness of the workshop. **B.** How much the workshop improved  
303 communication skills. **C.** How much the workshop improved networking skills. **D.** How much  
304 the workshop improved understanding of support teams and assistive roles.

305
